# Supplementary material for: Phytopigment Alizarin Inhibits Multispecies Biofilm Development by Cutibacterium acnes, Staphylococcus aureus, and Candida albicans
Source: MDPI journal article supplement (doi:10.3390/pharmaceutics14051047), 2022-05-12
Supplement: s1 [file s1]

## Supplementary Materials

# Phytopigment alizarin inhibits multispecies biofilm development by *Cutibacterium acnes*, *Staphylococcus aureus*, and *Candida albicans*

Jin-Hyung Lee <sup>1,†</sup>, Yong-Guy Kim <sup>1,†</sup>, Sunyoung Park <sup>1</sup>, Liangbin Hu <sup>2</sup> and Jintae Lee <sup>1,\*</sup>

<sup>1</sup> School of Chemical Engineering, Yeungnam University, 280 Daehak-Ro, Gyeongsan, 38541, Republic of Korea; jinhlee@ynu.ac.kr (J.-H.L.); yongguy7@ynu.ac.kr (Y.-G.K.); sunyong3142@ynu.ac.kr (S.P.)

<sup>2</sup> School of Food & Biological Engineering, Shaanxi University of Science and Technology, People's Republic of China; 4437@sust.edu.cn (L.H.)

\* Correspondence: jtlee@ynu.ac.kr; Tel.: +82-53-810-2533, Fax: +82-53-810-4631

† Those authors contributed equally to this work.

**Table S1.** qRT-PCR primer sequences used for *C. acnes*.

| Gene       | Description                                                 | Primer                                   |
|------------|-------------------------------------------------------------|------------------------------------------|
| PPA1761    | Lipase                                                      | Forward 5'-CCT CAA GGT GTC TGG TCA TC-3' |
|            |                                                             | Reverse 5'-GAC TTC GTC GTT TTT CCA GA-3' |
| PPA1796    | Lipase                                                      | Forward 5'-CTC AAG GTT CGT GAA CGA GT-3' |
|            |                                                             | Reverse 5'-GCC ATA GAG CTC CTT GTT GA-3' |
| PPA2105    | Lipase                                                      | Forward 5'-GAT TTC CTT AGC ACG TGG AG-3' |
|            |                                                             | Reverse 5'-GAT GAC GGT GTA GGC GAT AC-3' |
| PPA1035    | Alpha/beta hydrolase, lipase                                | Forward 5'-TAT CGA TCA TGG GTG ATT CC-3' |
|            |                                                             | Reverse 5'-ATA GAG GGC GAG GAC TGA CT-3' |
| PPA380     | Hyaluronate lyase                                           | Forward 5'-CGC TCT GAA GGA TTC GTC-3'    |
|            |                                                             | Reverse 5'-GTC GTG CAG GAT ACA CAT GA-3' |
| <i>hly</i> | Hyaluronate lyase                                           | Forward 5'-CAA CAT CGC CGT GTT TAT TG-3' |
|            |                                                             | Reverse 5'-CCC ATG ACG ACG TAG AGG AT-3' |
| PPA0721    | Invasion-associated protein                                 | Forward 5'-AGA AGA AGG AAC AGG AGG CC-3' |
|            |                                                             | Reverse 5'-TCA GGA ATC GGC ACT TGA CT-3' |
| PPA1962    | Invasion-associated protein                                 | Forward 5'-TTC AGT AAA GGC CCG AGT GT-3' |
|            |                                                             | Reverse 5'-ACA GGT AGT GGT GGT CGA TG-3' |
| PPA1983    | Adhesins (Thrombospondin type 3 repeats, PKD, SEST domains) | Forward 5'-AAG GGG ATT ACG GCT GTC AA-3' |
|            |                                                             | Reverse 5'-CAG CCT GGT CTT TGT GGT TC-3' |
| PPA1906    |                                                             | Forward 5'-AAG GGG ATT ACG GCT GTC AA-3' |

|                 |                                                                                                      |                                             |
|-----------------|------------------------------------------------------------------------------------------------------|---------------------------------------------|
|                 | Adhesins (Thrombospondin type 3 repeats, PKD, SEST domains), PTRPs/host-interacting factors          | Reverse 5'-CAG CCT GGT CTT TGT GGT TC-3'    |
| <b>PPA1715</b>  | PTRPs (Proline-Threonine Repetitive Protein, recognizing human fibrinogen) /host-interacting factors | Forward 5'-GTT CAA GCT GTC CCA CAA GG-3'    |
|                 |                                                                                                      | Reverse 5'-TTG CTA TCG GTG AGG GTC TC-3'    |
| <b>PPA2127</b>  |                                                                                                      | Forward 5'-TCA CTG ATG CGA AGA TCC AG-3'    |
|                 |                                                                                                      | Reverse 5'-TTG CCA ACT TCT TGT CAA CG-3'    |
| <i>luxS</i>     | S-ribosylhomocysteine lyase                                                                          | Forward 5'-AGC CCA ACA AGG AAC ATC TG-3'    |
|                 |                                                                                                      | Reverse 5'-TGT TGA GCT TGA GGA TGT CG-3'    |
| <b>PPA0149</b>  | Glycosyltransferase                                                                                  | Forward 5'-AGT ACA TGG CTT CCC GAG TG-3'    |
|                 |                                                                                                      | Reverse 5'-CTT GGG ACT CGA AGT TGA GC-3'    |
| <i>btuR</i>     | Cobinamide/cobalamin adenosyltransferase                                                             | Forward 5'-GGA AGA TGC TCT TCG GGC GCT-3'   |
|                 |                                                                                                      | Reverse 5'-GCC TCA GGG TTC TCC GCA GC-3'    |
| <i>cbiL</i>     | Precorrin-2 C(20)-methyltransferase                                                                  | Forward 5'-GCG CGA GGC AGA CGT GAT CC-3'    |
|                 |                                                                                                      | Reverse 5'-GAC ACC GGA CCT CTC CCG CA-3'    |
| <i>roxP</i>     | Radical oxygenase                                                                                    | Forward 5'-GCA TCT AGC CCT CTC ACC AT-3'    |
|                 |                                                                                                      | Reverse 5'-CTG AGA GTC CGG TAG GTG GT-3'    |
| <i>tly</i>      | Lysis of red blood cells                                                                             | Forward 5'-CAG GAC GTG ATG GCA ATG CGA-3'   |
|                 |                                                                                                      | Reverse 5'-TCG TTC ACA AGA CCA CAG TAG C-3' |
| <b>PPA0349</b>  | Polysaccharide capsule biosynthesis                                                                  | Forward 5'-CTT CTT CGT CGA CCA GTT CC-3'    |
|                 |                                                                                                      | Reverse 5'-TCA GCT GTC TCG TCA ACA CC-3'    |
| <b>PPA1098</b>  | DnaK, Hsp70 family protein                                                                           | Forward 5'-TGG ATC TGG GAG TCG ACC TA-3'    |
|                 |                                                                                                      | Reverse 5'-TTA GCA CCG TTG AGC AGA GA-3'    |
| <b>PPA2139</b>  | Cutinase                                                                                             | Forward 5'-CGA GAA TGG ACT GTG CTT CG-3'    |
|                 |                                                                                                      | Reverse 5'-GTT GAT GGC ATC GTG GAG TC-3'    |
| <b>PPA1222</b>  | Polyprenol monophosphomannose synthase                                                               | Forward 5'-ATG ACG CCC TAG TCG AAA TG-3'    |
|                 |                                                                                                      | Reverse 5'-ATG AGT TCG CGG TAC TTT GG-3'    |
| <i>16s rRNA</i> | 16S ribosomal RNA (House keeping gene)                                                               | Forward 5'-GGG GCT TAA CCC TGA GCG TGC -3'  |
|                 |                                                                                                      | Reverse 5'-TTC GCT CCC CAC GCT TTC GC-3'    |

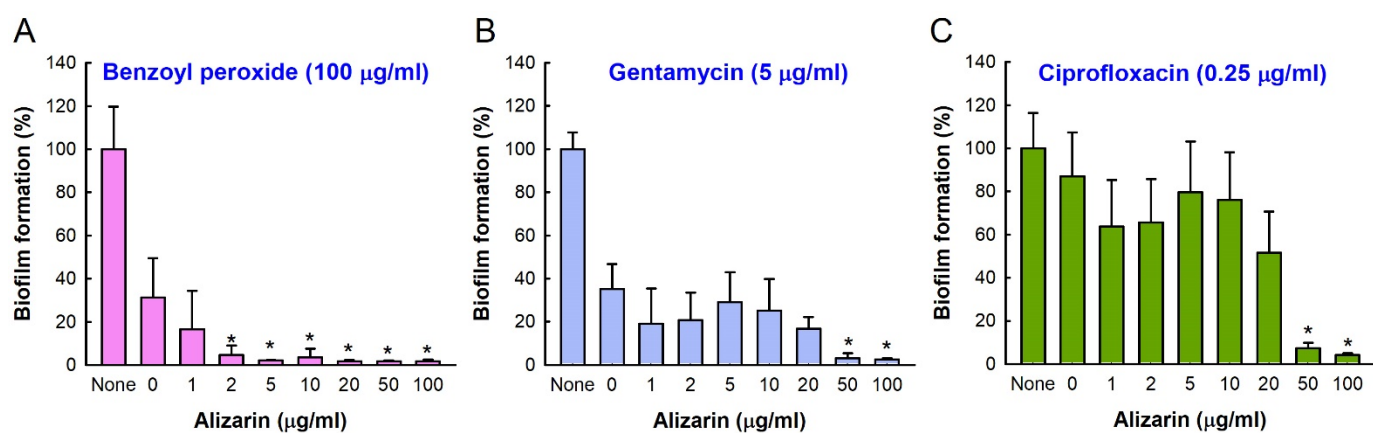

**Figure S1.** Combinatory antibiofilm activity of alizarin along with antibiotics against *C. acnes*. Biofilm inhibitions by benzoyl peroxide at 100 µg/ml (A), gentamycin at 5 µg/ml (B), and ciprofloxacin 0.25 µg/ml (C) with alizarin (0, 1, 2, 5, 10, 20, 50, and 100 µg/ml) were measured after incubation for 6 days in 96-well plates at 37°C under anaerobic conditions. Error bars indicate standard deviations. \*,  $P < 0.05$  vs. non-treated controls.
